# Supplementary material
Source: publisher figshare collection journal article supplement (https://karger.figshare.com/ndownloader/files/8716831)
Supplement: Supplementary file 1 [file 8716831]

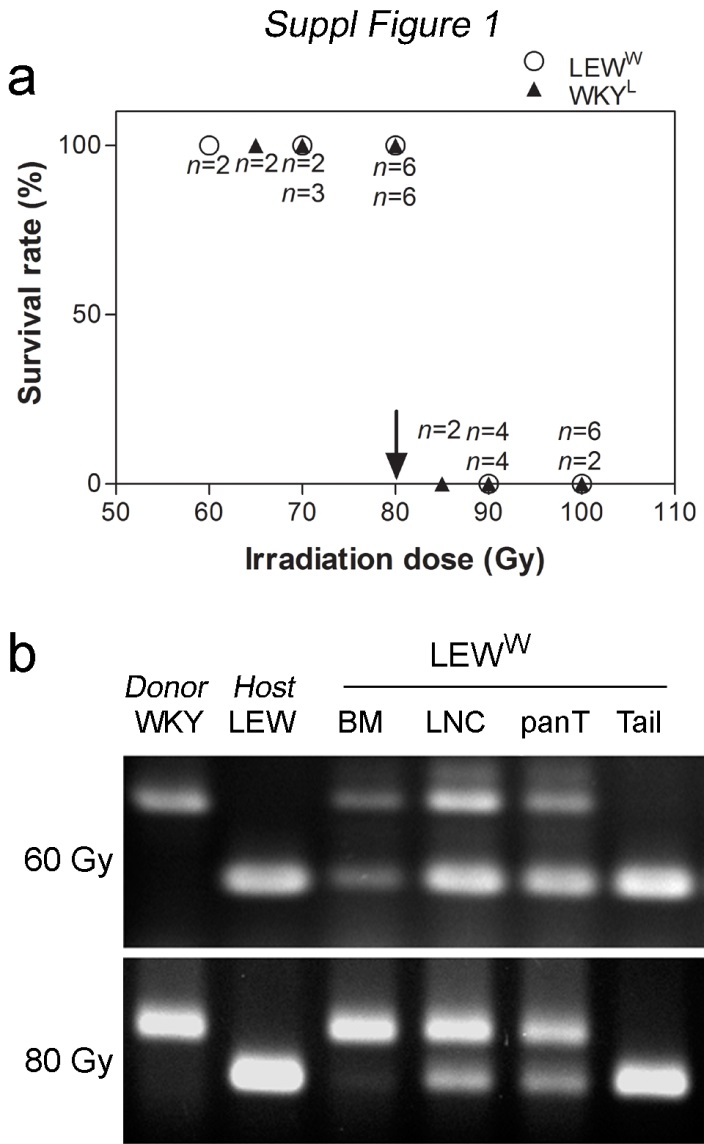


***Supplementary Figure 1***. **Characterization of bone marrow (BM) chimeras between WKY and LEW rats**. (**a**)Irradiation dose-dependent mortality for determination of optimal dosage for creation of BM chimera. Arrow indicates the maximal survival dose. (**b**)Determination of origins of various tissues/cells from chimera irradiated at 60 or 80 Gy in representative LEWW chimeras by PCR-based genotyping using polymorphic microsatellite DNA as probes. *BM*, bone marrow; *LNC*, lymph node cells; p*anT*, pan T cells from PBL. Results for microsatellite D3R201 are shown; other two are similar.
